# Supplementary material for: The BaCe0.16Y0.04Fe0.8O3−δ nanocomposite: a new high-performance cobalt-free triple-conducting cathode for protonic ceramic fuel cells operating at reduced temperatures
Source: Royal Society of Chemistry journal article supplement (doi:10.1039/d1ta10652j), 2022-01-01
Supplement: d1ta10652j1.pdf [file d1ta10652j1.pdf]

Electronic Supplementary Material (ESI) for Journal of Materials Chemistry A. This journal is © The Royal Society of Chemistry 2021

## Supporting information for

**BaCe<sub>0.16</sub>Y<sub>0.04</sub>Fe<sub>0.8</sub>O<sub>3-δ</sub> nanocomposite: A new high-performance cobalt-free triple-conducting cathode for protonic ceramic fuel cells operating at reduced temperatures**

**Dan Zou<sup>1</sup>, Yongning Yi<sup>1</sup>, Yufei Song<sup>2</sup>, Daqin Guan<sup>1</sup>, Meigui Xu<sup>1</sup>, Ran Ran<sup>1</sup>, Wei Wang<sup>1\*</sup>, Wei Zhou<sup>1</sup>, Zongping Shao<sup>1,3\*</sup>**

<sup>1</sup> *State Key Laboratory of Materials-Oriented Chemical Engineering, College of Chemical Engineering, Nanjing Tech University, Nanjing 210009, China*

<sup>2</sup> *Department of Mechanical and Aerospace Engineering, The Hong Kong University of Science and Technology, Clear Water Bay, Hong Kong, China*

<sup>3</sup> *WA School of Mines: Minerals, Energy and Chemical Engineering (WASM-MECE), Curtin University, Perth, WA 6845, Australia*

**\* Corresponding authors**

E-mail: wangwei@njtech.edu.cn (W. Wang); shaozp@njtech.edu.cn (Z. Shao)

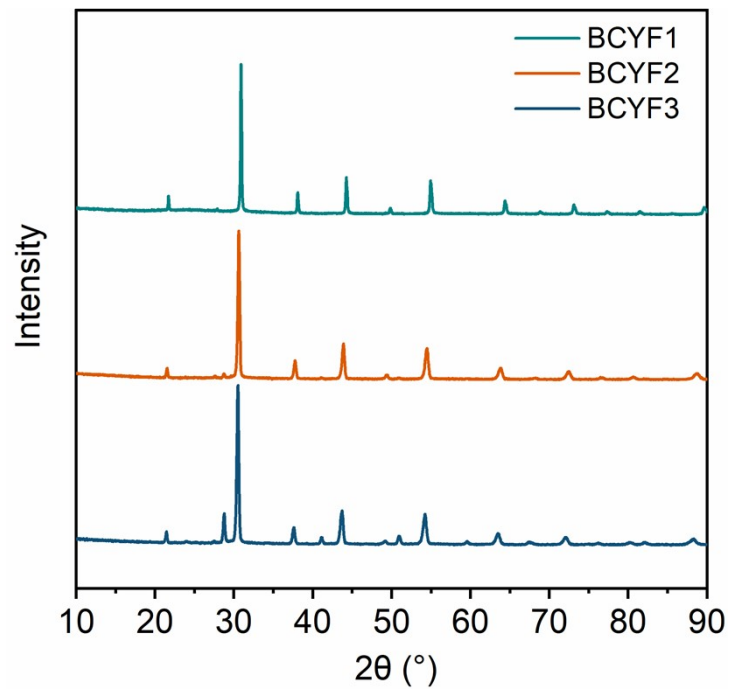

**Fig. S1.** XRD patterns of as-synthesized BCYF1, BCYF2 and BCYF3 samples after a natural cooling from 1000 °C to room temperature.

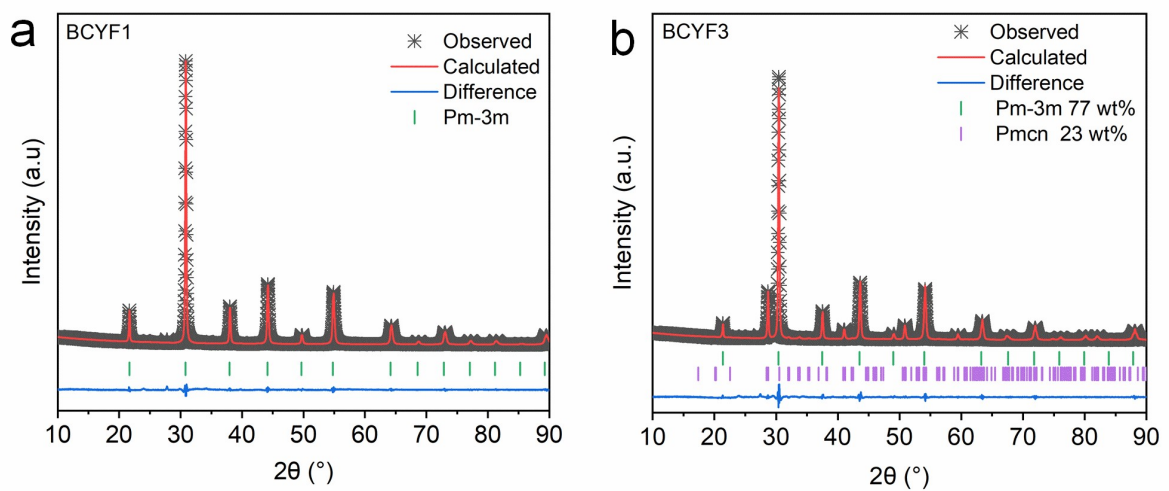

**Fig. S2.** Refined XRD patterns of (a) BCYF1 and (b) BCYF3.

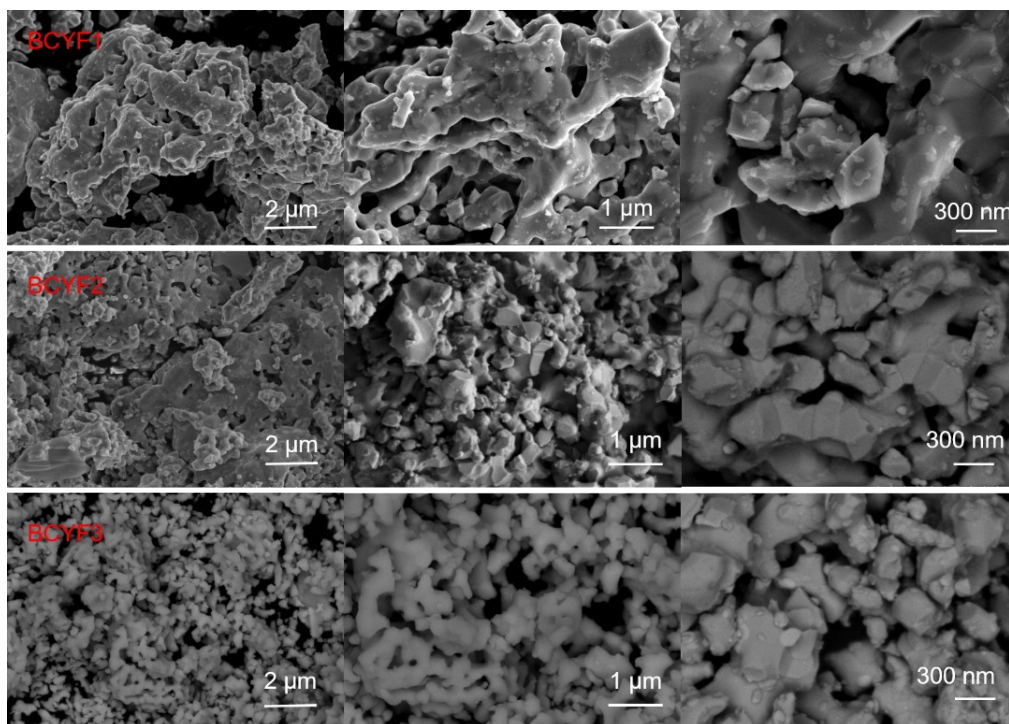

**Fig. S3.** SEM images of BCYF1, BCYF2 and BCYF3 samples.

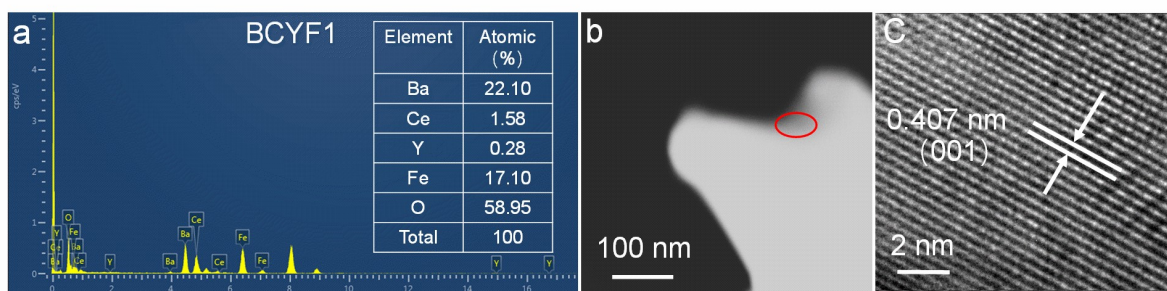

**Fig. S4.** (a) Point EDX scanning results, (b) STEM image, (c) HR-TEM image of BCYF1.

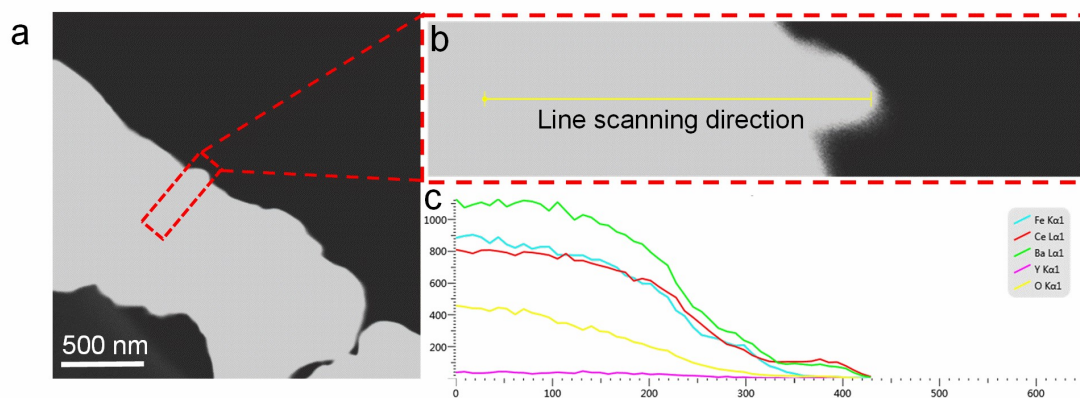

**Fig. S5.** Linear EDX scanning results of BCYF2: (a) STEM image, (b) line scanning area selected from Fig. S4, (c) linear EDX scanning results.

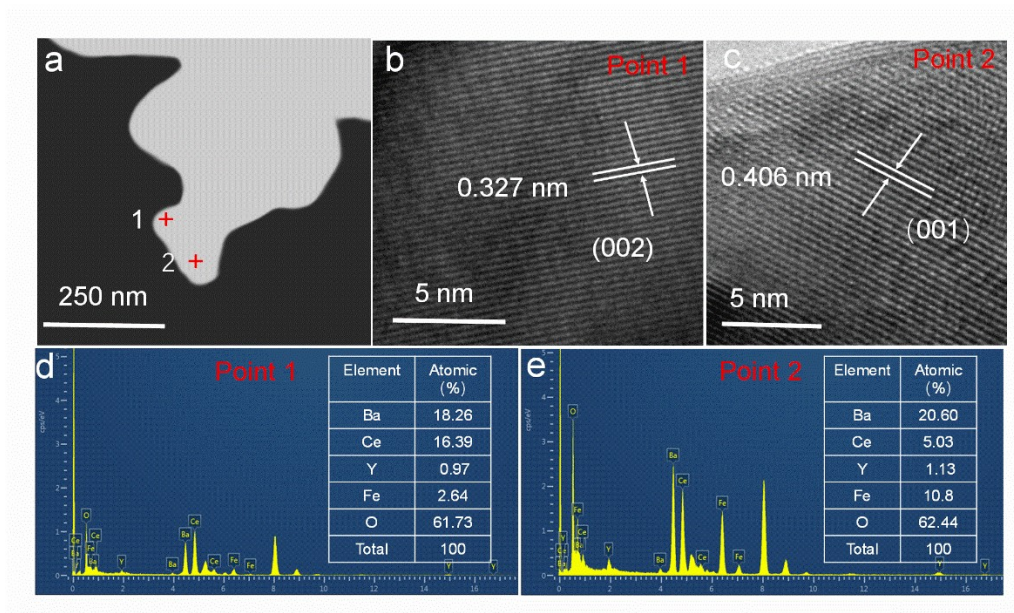

**Fig. S6.** (a) STEM image, (b, c) HR-TEM images of point 1 and 2 and (d, e) point EDX scanning results of BCYF3.

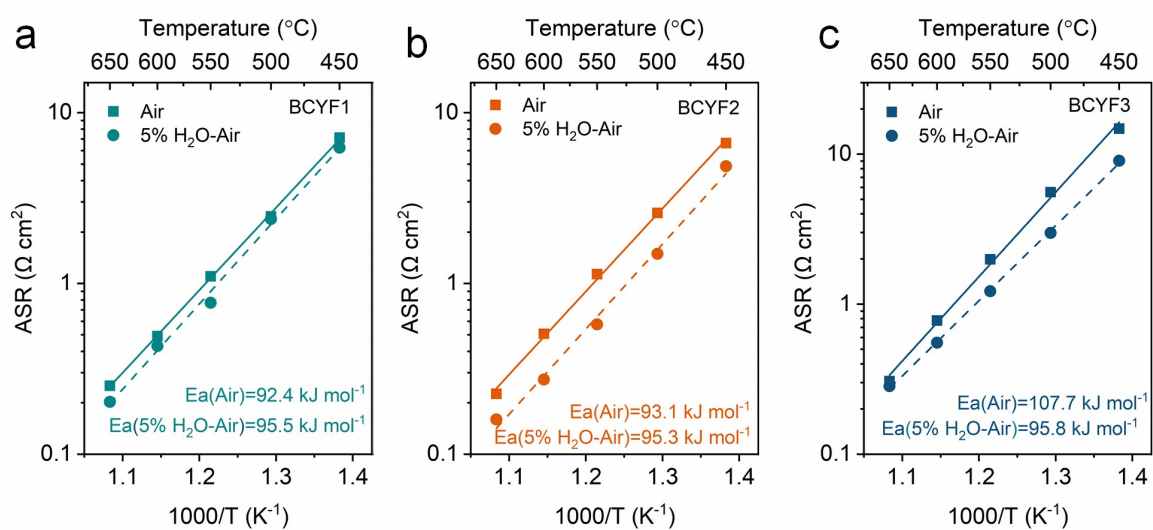

**Fig. S7.** Arrhenius plots of ASR values of various cathodes in BZCYYb-supported symmetrical cells in air and in 5 vol.% H<sub>2</sub>O-air: (a) BCYF1, (b) BCYF2 and (c) BCYF3.

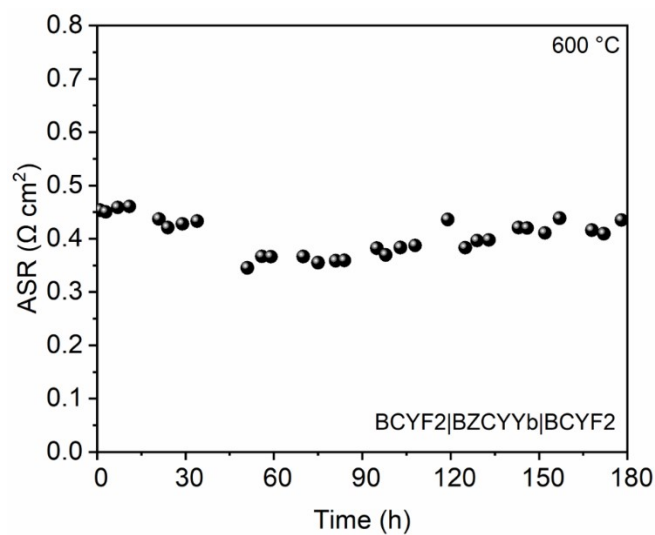

**Fig. S8.** ASR stability of BCYF2 cathode in a symmetrical cell at 600 °C in wet air.

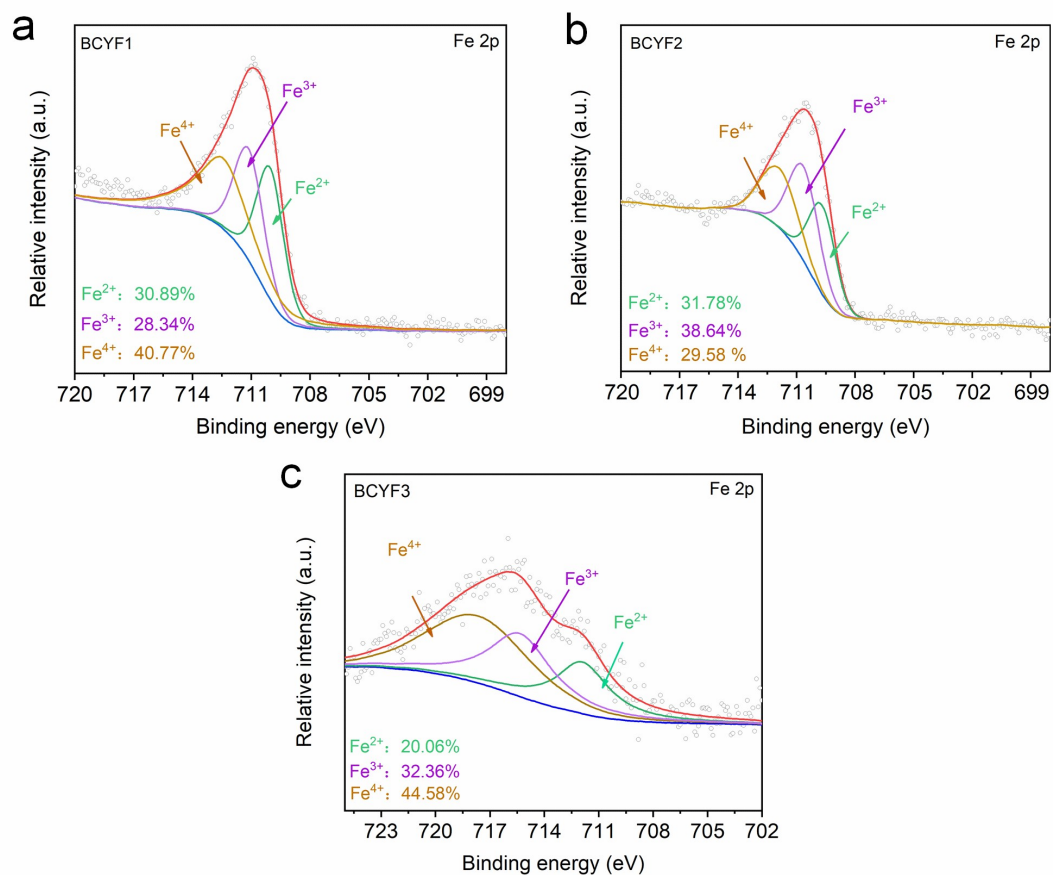

**Fig. S9.** Fe 2p XPS spectra of (a) BCYF1, (b) BCYF2 and (c) BCYF3 samples.

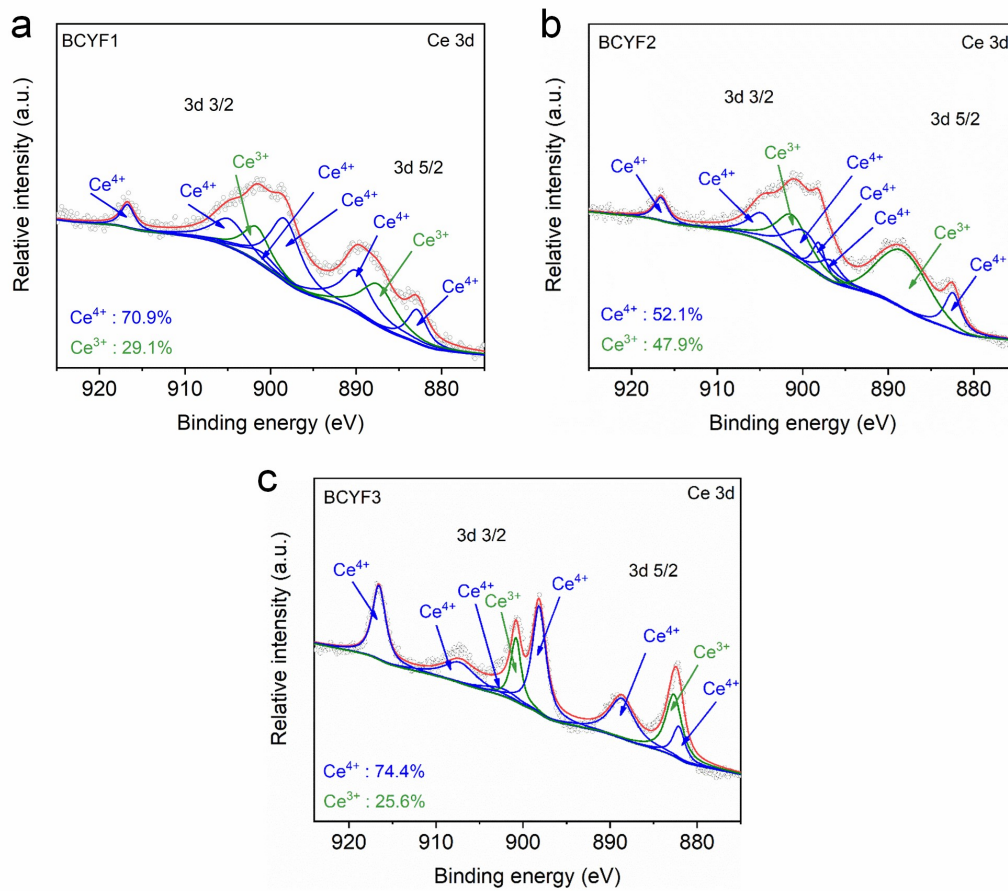

**Fig. S10.** Ce 3d XPS spectra of (a) BCYF1, (b) BCYF2 and (c) BCYF3 samples.

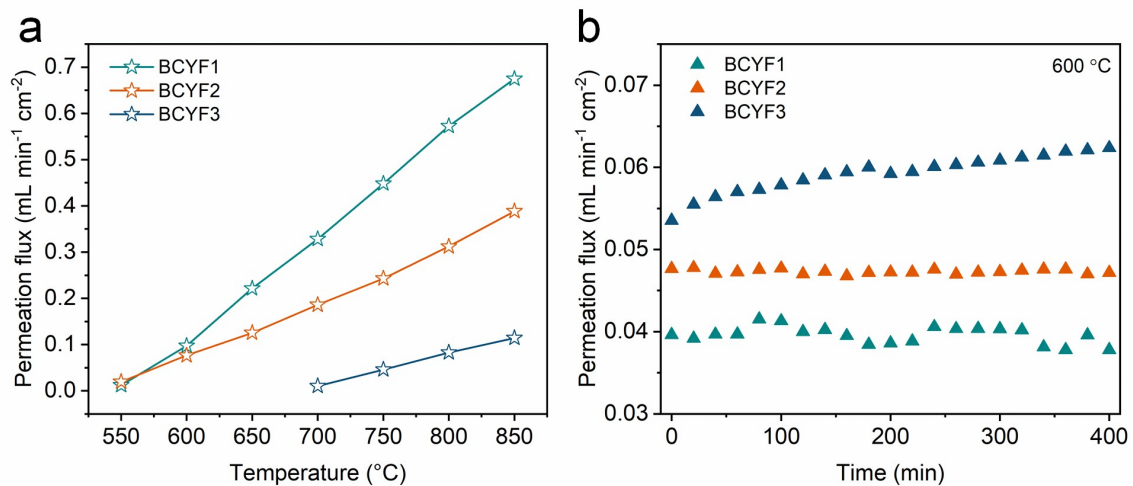

**Fig. S11.** (a) O<sub>2</sub> permeation rates and (b) H<sub>2</sub> permeation rates of BCYF1, BCYF2 and BCYF3.

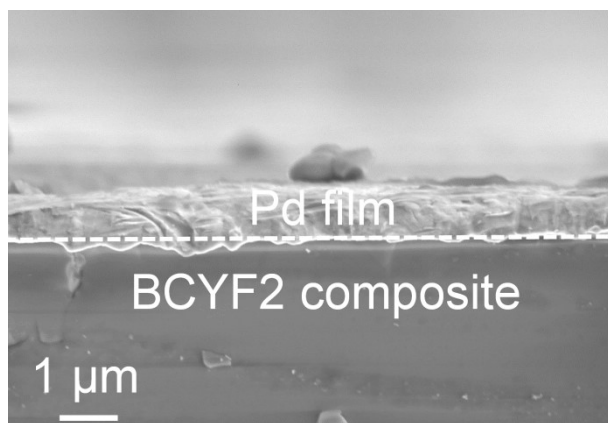

**Fig. S12.** The typical cross-sectional SEM image of Pd film on the BCYF2 pellet surface.

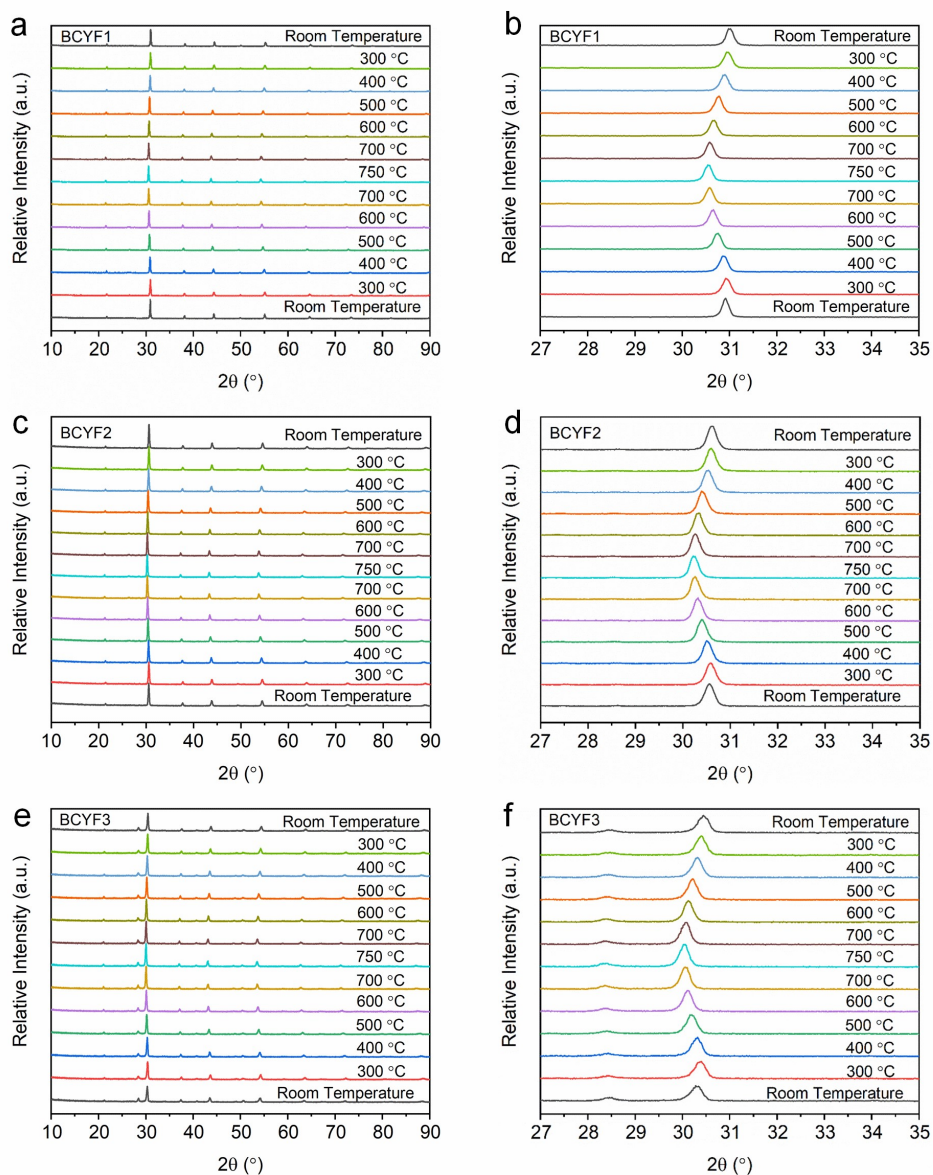

**Fig. S13.** High-temperature XRD patterns of (a, b) BCYF1, (c, d) BCYF2 and (e, f) BCYF3 sample from room temperature to 750 °C with different 2-theta ranges.

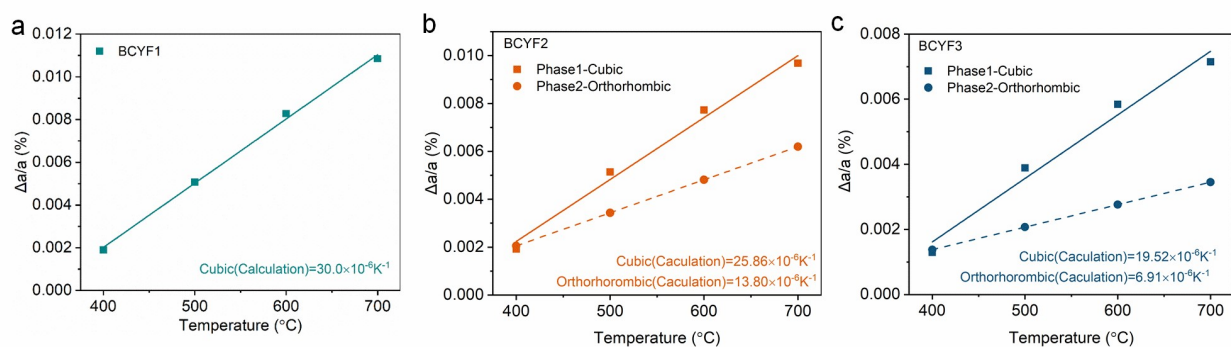

**Fig. S14.** The calculated TECs of BCYF1, (b) BCYF2 and (c) BCYF3 samples based on HT-XRD patterns.

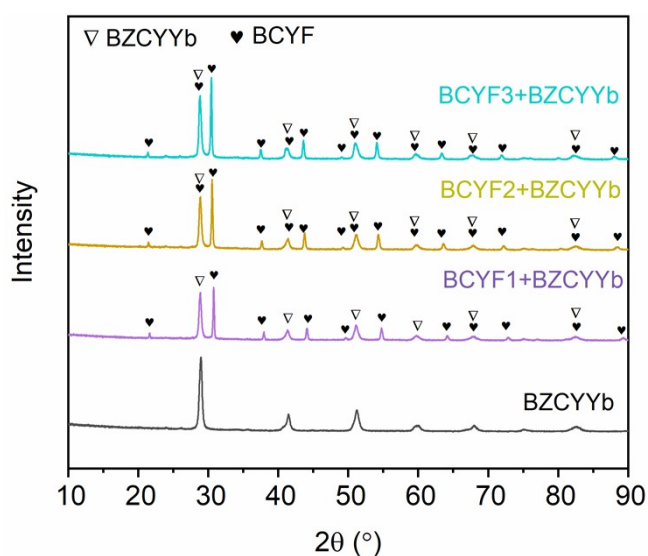

**Fig. S15.** XRD patterns of BZCYYb and the BCYF+BZCYYb composites (1:1, weight ratio) prepared by physical mixing after a calcination at 1000 °C for 2 h in air.

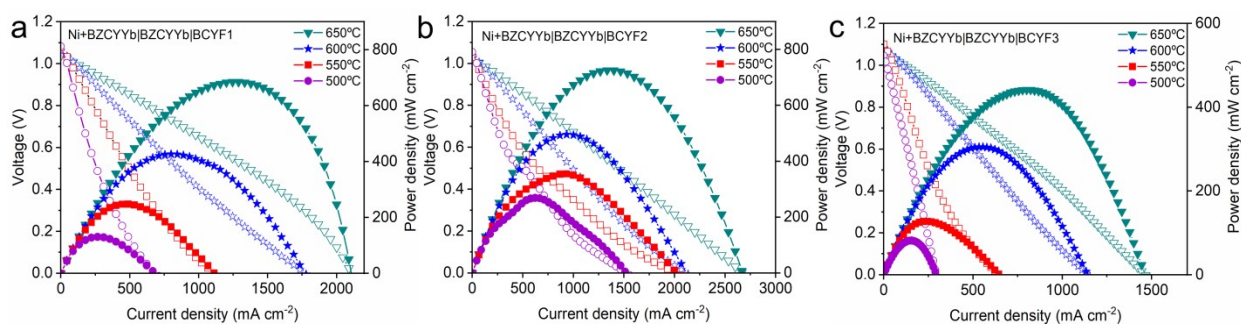

**Fig. S16.** *I-V* and *I-P* curves of anode-supported single cells with (a) BCYF1, (b) BCYF2 and (c) BCYF3 cathode exposed to static air.



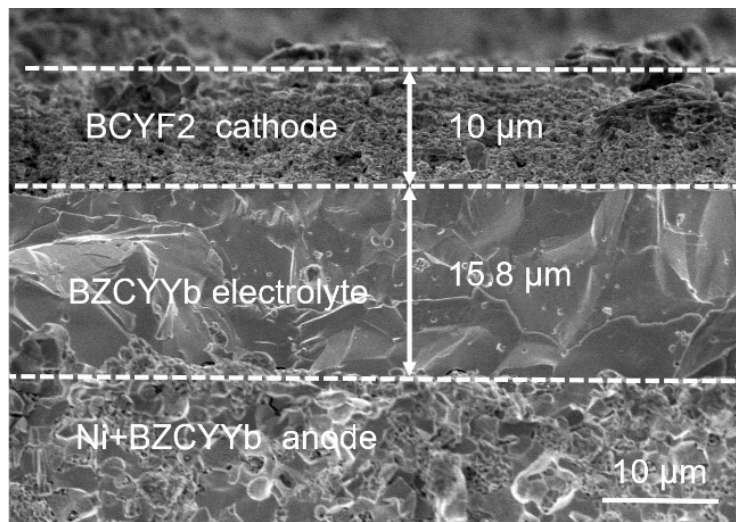

**Fig. S17.** Cross-sectional SEM image of the anode-supported single cell with BCYF2 cathode.

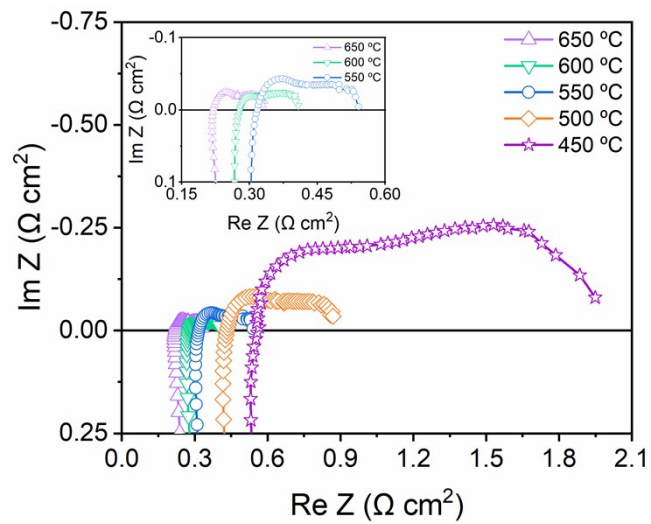

**Fig. S18.** EIS spectra of the single cell with BCYF2 cathode exposed to flowing air at 650-450 °C.

**Table S1.** Summary of Rietveld refinements results for BCYF1, BCYF2 and BCYF3 samples.

| Sample | Crystal parameters                                                | Phase proportions (wt. %) | Refinement parameters                          |
|--------|-------------------------------------------------------------------|---------------------------|------------------------------------------------|
| BCYF1  | Cubic (Pm-3m)<br>a= 4.0934(3)<br>b=4.0934(3)<br>c=4.0934(3)       | 100                       | $R_{wp} = 4.99$ , $R_p = 3.70$ ,<br>GOF = 2.03 |
| BCYF2  | Cubic (Pm-3m)<br>a=4.1250(2)<br>b=4.1250(2)<br>c=4.1250(2)        | 96.6                      | $R_{wp} = 5.16$ , $R_p = 3.85$ ,<br>GOF = 2.08 |
|        | Orthorhombic (Pmcn)<br>a= 8.7033(6)<br>b=6.2060(0)<br>c=6.2308(0) | 3.4                       |                                                |
| BCYF3  | Cubic (Pm-3m)<br>a=4.1553(5)<br>b=4.1553(5)<br>c=4.1553(5)        | 77.0                      | $R_{wp} = 5.65$ , $R_p = 4.13$ ,<br>GOF = 2.34 |
|        | Orthorhombic (Pmcn)<br>a=8.7600(0)<br>b=6.2703(0)<br>c= 6.2083(7) | 23.0                      |                                                |

**Table S2.** Point EDX scanning results of BCYF2 sample.

| Element | Atomic ratios at different points (%) |      |      |      |      |      |      |      |      |      |
|---------|---------------------------------------|------|------|------|------|------|------|------|------|------|
|         | 1                                     | 2    | 3    | 4    | 5    | 6    | 7    | 8    | 9    | 10   |
| Ba      | 35.2                                  | 36.8 | 35   | 39.8 | 36.3 | 33.5 | 37.5 | 34.6 | 35.2 | 36.0 |
| Fe      | 6.0                                   | 9.1  | 3.5  | 18.4 | 17.7 | 19.4 | 17.6 | 20.9 | 19.2 | 20.3 |
| Ce      | 27.4                                  | 22.3 | 29.2 | 6.4  | 4.9  | 5.5  | 4.9  | 5.1  | 5.2  | 5.2  |
| Y       | 1.8                                   | 1.4  | 1.4  | 1.4  | 1.6  | 1.4  | 1.1  | 1.2  | 1.3  | 1.3  |
| O       | 29.5                                  | 30.4 | 30.8 | 33.9 | 39.4 | 40.2 | 38.9 | 38.1 | 39.0 | 37.2 |

**Table S3.** ASR values of BCYF1, BCYF2 and BCYF3 cathodes based on SDC electrolyte.

| Cathode | Atmosphere | ASR, $\Omega \text{ cm}^2$ (Temp. °C) |       |      |       |      |
|---------|------------|---------------------------------------|-------|------|-------|------|
|         |            | 650                                   | 600   | 550  | 500   | 450  |
| BCYF1   | air        | 0.045                                 | 0.090 | 0.21 | 0.646 | 2.72 |
| BCYF2   | air        | 0.05                                  | 0.097 | 0.25 | 0.594 | 2.13 |
| BCYF3   | air        | 0.14                                  | 0.3   | 0.63 | 1.49  | 4.95 |

**Table S4.** ASR value comparison of BCYF2 cathode with other reported Co-free cathodes in O-SOFCs.

| Cathode                                                                                                                                | Electrolyte | ASR, $\Omega \text{ cm}^2$ (Temp. $^{\circ}\text{C}$ ) |          |             |              |             |              | Ref.             |
|----------------------------------------------------------------------------------------------------------------------------------------|-------------|--------------------------------------------------------|----------|-------------|--------------|-------------|--------------|------------------|
|                                                                                                                                        |             | 750                                                    | 700      | 650         | 600          | 550         | 500          |                  |
| Ba <sub>0.5</sub> Sr <sub>0.5</sub> Fe <sub>0.8</sub> Cu <sub>0.2</sub> O <sub>3-<math>\delta</math></sub> (BSFC)                      | SDC         | /                                                      | 0.137    | 0.22        | 0.365        | 0.939       | /            | [1]              |
| Ba <sub>0.95</sub> La <sub>0.05</sub> FeO <sub>3-<math>\delta</math></sub> (BLF)                                                       | SDC         | 0.021                                                  | 0.037    | 0.086       | /            | /           | /            | [2]              |
| BaNb <sub>0.05</sub> Fe <sub>0.95</sub> O <sub>3-<math>\delta</math></sub> (BNF)                                                       | SDC         | 0.016                                                  | 0.026    | 0.058       | 0.147        | 0.427       | /            | [3]              |
| Ba <sub>0.5</sub> Sr <sub>0.5</sub> Fe <sub>0.8</sub> Cu <sub>0.1</sub> Ti <sub>0.1</sub> O <sub>3-<math>\delta</math></sub> (BSFCuTi) | GDC         | 0.059                                                  | 0.103    | 0.19        | 0.47         | /           | /            | [4]              |
| BaFe <sub>0.85</sub> Cu <sub>0.15</sub> O <sub>3-<math>\delta</math></sub> (BFC)                                                       | CGO         | 0.35                                                   | 0.80     | 2.05        | /            | /           | /            | [5]              |
| BaFe <sub>0.95</sub> Sn <sub>0.05</sub> O <sub>3-<math>\delta</math></sub> (BFS)                                                       | SDC         | 0.018                                                  | 0.033    | 0.077       | 0.207        | 0.65        | /            | [6]              |
| BaFe <sub>0.75</sub> Ni <sub>0.25</sub> O <sub>3-<math>\delta</math></sub> (BFNi25)                                                    | CGO         | /                                                      | 0.095    | 0.184       | 0.364        | /           | /            | [7]              |
| Ba <sub>0.95</sub> Ca <sub>0.05</sub> Fe <sub>0.95</sub> In <sub>0.05</sub> O <sub>3-<math>\delta</math></sub> (BCFI)                  | SDC         | /                                                      | 0.038    | 0.089       | 0.21         | 0.44        | 1.00         | [8]              |
| Sr <sub>0.9</sub> Ce <sub>0.1</sub> Fe <sub>0.8</sub> Ni <sub>0.2</sub> O <sub>3-<math>\delta</math></sub> (SCFN)                      | SDC         | /                                                      | /        | 0.028       | 0.072        | 0.29        | 1.28         | [9]              |
| <b>BCYF2</b>                                                                                                                           | <b>SDC</b>  | <b>/</b>                                               | <b>/</b> | <b>0.05</b> | <b>0.097</b> | <b>0.25</b> | <b>0.594</b> | <b>This work</b> |

SDC: Sm<sub>0.2</sub>Ce<sub>0.8</sub>O<sub>1.9</sub>; GDC: Gd<sub>0.2</sub>Ce<sub>0.8</sub>O<sub>1.9</sub>; CGO: Ce<sub>0.9</sub>Gd<sub>0.1</sub>O<sub>1.95</sub>

**Table S5.** ASR values of BCYF1, BCYF2 and BCYF3 cathodes based on BZCYYb electrolyte.

| Cathode | Atmosphere                   | ASR, $\Omega \text{ cm}^2$ (Temp. $^{\circ}\text{C}$ ) |      |      |      |      |
|---------|------------------------------|--------------------------------------------------------|------|------|------|------|
|         |                              | 650                                                    | 600  | 550  | 500  | 450  |
| BCYF1   | air                          | 0.25                                                   | 0.49 | 1.10 | 2.47 | 7.16 |
|         | 5 vol.% H <sub>2</sub> O-air | 0.20                                                   | 0.43 | 0.77 | 2.38 | 6.24 |
| BCYF2   | air                          | 0.23                                                   | 0.51 | 1.13 | 2.59 | 6.64 |
|         | 5 vol.% H <sub>2</sub> O-Air | 0.16                                                   | 0.27 | 0.58 | 1.49 | 4.86 |
| BCYF3   | air                          | 0.31                                                   | 0.78 | 1.99 | 5.59 | 14.8 |
|         | 5 vol.% H <sub>2</sub> O-air | 0.28                                                   | 0.55 | 1.22 | 2.99 | 9.05 |

**Table S6.** ASR value comparison of BCYF2 cathode with other reported Co-free cathodes in PCFCs.

| Cathode                                                                                                             | Electrolyte               | ASR, $\Omega \text{ cm}^2$ (Temp. $^{\circ}\text{C}$ ) |          |             |             |             |             | Atmosphere                  | Ref.             |
|---------------------------------------------------------------------------------------------------------------------|---------------------------|--------------------------------------------------------|----------|-------------|-------------|-------------|-------------|-----------------------------|------------------|
|                                                                                                                     |                           | 750                                                    | 700      | 650         | 600         | 550         | 500         |                             |                  |
| Ba <sub>0.95</sub> La <sub>0.05</sub> Fe <sub>0.8</sub> Zn <sub>0.2</sub> O <sub>3-<math>\delta</math></sub> (BLFZ) | BZCYYb <sup>1</sup>       | 0.29                                                   | 0.42     | 0.66        | 1.34        | /           | /           | 3%H <sub>2</sub> O-air      | [10]             |
| Nd <sub>0.6</sub> Ba <sub>0.4</sub> Fe <sub>0.9</sub> Cu <sub>0.1</sub> O <sub>3-<math>\delta</math></sub> (NBFC)   | BZCYYb <sup>2</sup>       | /                                                      | /        | 0.62        | 1.27        | 3.99        | 13.2        | 3%H <sub>2</sub> O-air      | [11]             |
| PrNi <sub>0.5</sub> Mn <sub>0.5</sub> O <sub>3</sub> (PNM)-PrO <sub>x</sub>                                         | BZCYYb <sup>1</sup>       | 0.021                                                  | 0.052    | 0.11        | 0.31        | /           | /           | 3%H <sub>2</sub> O          | [12]             |
| BaCe <sub>0.4</sub> Sm <sub>0.2</sub> Fe <sub>0.4</sub> O <sub>3-<math>\delta</math></sub> (BCSF)                   | BCS                       | 0.24                                                   | 0.45     | 0.83        | 2.02        | 5.34        | /           | 3%H <sub>2</sub> O-air      | [13]             |
| PrBaFe <sub>2</sub> O <sub>5+<math>\delta</math></sub> (PBF)                                                        | BZCY                      | /                                                      | 0.35     | 0.70        | 1.80        | /           | /           | 3%H <sub>2</sub> O-air      | [14]             |
| Nd <sub>1.95</sub> Ba <sub>0.05</sub> NiO <sub>4+<math>\delta</math></sub> (NBN)                                    | BCZD                      | /                                                      | 6.7      | 11.6        | 27.9        | 69.2        | /           | 3%H <sub>2</sub> O-air      | [15]             |
| Sr <sub>3</sub> Fe <sub>2</sub> O <sub>7-<math>\delta</math></sub>                                                  | BZCY                      | /                                                      | 0.31     | 0.80        | 2.41        | 7.26        | 26.0        | 5%H <sub>2</sub> O-air      | [16]             |
| SCFN                                                                                                                | BZCYYb <sup>1</sup>       | /                                                      | /        | 0.094       | 0.23        | 0.63        | 2.09        | 6%H <sub>2</sub> O-air      | [17]             |
| <b>BCYF2</b>                                                                                                        | <b>BZCYYb<sup>1</sup></b> | <b>/</b>                                               | <b>/</b> | <b>0.16</b> | <b>0.27</b> | <b>0.58</b> | <b>1.49</b> | <b>5%H<sub>2</sub>O-air</b> | <b>This work</b> |

BZCYYb<sup>1</sup>: BaZr<sub>0.1</sub>Ce<sub>0.7</sub>Y<sub>0.1</sub>Yb<sub>0.1</sub>O<sub>3- $\delta$</sub> ; BZCYYb<sup>2</sup>: BaCe<sub>0.5</sub>Zr<sub>0.3</sub>Y<sub>0.1</sub>Yb<sub>0.1</sub>O<sub>3- $\delta$</sub> ; BCS: BaCe<sub>0.8</sub>Sm<sub>0.2</sub>O<sub>3- $\delta$</sub> ;

BZCY<sup>2</sup>: BaZr<sub>0.3</sub>Ce<sub>0.5</sub>Y<sub>0.2</sub>O<sub>3- $\delta$</sub> ; BCZD: BaCe<sub>0.5</sub>Zr<sub>0.3</sub>Dy<sub>0.2</sub>O<sub>3- $\delta$</sub> .

**Table S7.** Peak deconvolution results of XPS spectra for BCYF1, BCYF2 and BCYF3 cathodes

| Sample | Fe 2p (%)        |                  |                  | Ce 3d (%)        |                  | O 1s (%)         |                  |                                    |
|--------|------------------|------------------|------------------|------------------|------------------|------------------|------------------|------------------------------------|
|        | Fe <sup>2+</sup> | Fe <sup>3+</sup> | Fe <sup>4+</sup> | Ce <sup>4+</sup> | Ce <sup>3+</sup> | O <sub>ads</sub> | O <sub>lat</sub> | O <sub>ads</sub> /O <sub>lat</sub> |
| BCYF1  | 30.9             | 28.3             | 40.8             | 70.9             | 29.1             | 86.6             | 13.4             | 6.46                               |
| BCYF2  | 31.8             | 38.6             | 29.6             | 52.1             | 47.9             | 85.8             | 14.2             | 6.04                               |
| BCYF3  | 20.0             | 32.4             | 44.6             | 74.4             | 25.6             | 41.7             | 58.3             | 0.71                               |

**Table S8.** Evolution of ASR values of BCYF1, BCYF2 and BCYF3 in BZCYYb-based symmetrical cells in 5 vol.% H<sub>2</sub>O-air (with and without 1 vol.% CO<sub>2</sub>) at 600 °C.

| Cathode | ASR ( $\Omega \text{ cm}^2$ ) against the exposure time (min) |      |      |      |      |                                   |      |      |      |      |
|---------|---------------------------------------------------------------|------|------|------|------|-----------------------------------|------|------|------|------|
|         | 5 vol.%H <sub>2</sub> O-air+1 vol.% CO <sub>2</sub>           |      |      |      |      | after the CO <sub>2</sub> removal |      |      |      |      |
|         | 0                                                             | 20   | 40   | 60   | 80   | 100                               | 120  | 140  | 160  | 180  |
| BCYF1   | 0.35                                                          | 0.75 | 0.60 | 0.68 | 0.76 | 0.64                              | 0.43 | 0.47 | 0.52 | 0.46 |
| BCYF2   | 0.21                                                          | 0.64 | 0.65 | 0.67 | 0.69 | 0.69                              | 0.16 | 0.19 | 0.17 | 0.18 |
| BCYF3   | 0.70                                                          | 2.78 | 2.94 | 3.06 | 3.08 | 3.35                              | 0.82 | 0.83 | 0.81 | 0.78 |

**Table S9.** PPD value comparison of PCFCs based on BCYF2 cathode and other reported Co-free cathodes.

| Cathode                                                                                                                                                                                                                                        | Electrolyte                                                                                                 | PPD at 600 °C (mW cm <sup>-2</sup> ) | Ref.             |
|------------------------------------------------------------------------------------------------------------------------------------------------------------------------------------------------------------------------------------------------|-------------------------------------------------------------------------------------------------------------|--------------------------------------|------------------|
| BaCe <sub>0.5</sub> Fe <sub>0.5</sub> O <sub>3-<math>\delta</math></sub>                                                                                                                                                                       | BaZr <sub>0.1</sub> Ce <sub>0.7</sub> Y <sub>0.2</sub> O <sub>3-<math>\delta</math></sub>                   | 192                                  | [18]             |
| Ba <sub>0.95</sub> La <sub>0.05</sub> Fe <sub>0.8</sub> Zn <sub>0.2</sub> O <sub>3-<math>\delta</math></sub> -BaZr <sub>0.1</sub> Ce <sub>0.7</sub> Y <sub>0.1</sub> Yb <sub>0.1</sub> O <sub>3-<math>\delta</math></sub>                      | BaZr <sub>0.1</sub> Ce <sub>0.7</sub> Y <sub>0.1</sub> Yb <sub>0.1</sub> O <sub>3-<math>\delta</math></sub> | 142                                  | [10]             |
| BaCe <sub>0.5</sub> Fe <sub>0.3</sub> Bi <sub>0.2</sub> O <sub>3-<math>\delta</math></sub>                                                                                                                                                     | BaZr <sub>0.1</sub> Ce <sub>0.7</sub> Y <sub>0.2</sub> O <sub>3-<math>\delta</math></sub>                   | 362                                  | [19]             |
| BaFe <sub>0.8</sub> Ce <sub>0.1</sub> Y <sub>0.1</sub> O <sub>3-<math>\delta</math></sub> -BaCe <sub>0.8</sub> Fe <sub>0.1</sub> Y <sub>0.1</sub> O <sub>3-<math>\delta</math></sub>                                                           | BaZr <sub>0.1</sub> Ce <sub>0.7</sub> Y <sub>0.2</sub> O <sub>3-<math>\delta</math></sub>                   | 417                                  | [20]             |
| BaCe <sub>0.1</sub> Zr <sub>0.2</sub> Y <sub>0.1</sub> Fe <sub>0.6</sub> O <sub>3-<math>\delta</math></sub>                                                                                                                                    | BaCe <sub>0.5</sub> Zr <sub>0.3</sub> Y <sub>0.1</sub> Yb <sub>0.1</sub> O <sub>3-<math>\delta</math></sub> | 74                                   | [21]             |
| BaZr <sub>0.2</sub> Fe <sub>0.6</sub> Y <sub>0.2</sub> O <sub>3-<math>\delta</math></sub>                                                                                                                                                      | BaZr <sub>0.1</sub> Ce <sub>0.7</sub> Y <sub>0.2</sub> O <sub>3-<math>\delta</math></sub>                   | 175                                  | [22]             |
| La <sub>0.35</sub> Pr <sub>0.15</sub> Sr <sub>0.5</sub> FeO <sub>3-<math>\delta</math></sub>                                                                                                                                                   | BaZr <sub>0.1</sub> Ce <sub>0.7</sub> Y <sub>0.2</sub> O <sub>3-<math>\delta</math></sub>                   | 400                                  | [23]             |
| BaFe <sub>0.5</sub> Sn <sub>0.2</sub> Bi <sub>0.3</sub> O <sub>3-<math>\delta</math></sub>                                                                                                                                                     | BaZr <sub>0.1</sub> Ce <sub>0.7</sub> Y <sub>0.2</sub> O <sub>3-<math>\delta</math></sub>                   | 841                                  | [24]             |
| Bi <sub>0.5</sub> Ba <sub>0.5</sub> FeO <sub>3-<math>\delta</math></sub>                                                                                                                                                                       | BaZr <sub>0.1</sub> Ce <sub>0.7</sub> Y <sub>0.2</sub> O <sub>3-<math>\delta</math></sub>                   | 38                                   | [25]             |
| Ca <sub>0.3</sub> Y <sub>0.7</sub> Fe <sub>0.5</sub> Co <sub>0.5</sub> O <sub>3-<math>\delta</math></sub> -BaZr <sub>0.1</sub> Ce <sub>0.7</sub> Y <sub>0.2</sub> O <sub>3-<math>\delta</math></sub>                                           | BaZr <sub>0.1</sub> Ce <sub>0.7</sub> Y <sub>0.2</sub> O <sub>3-<math>\delta</math></sub>                   | 300                                  | [26]             |
| Ba <sub>0.95</sub> Ca <sub>0.05</sub> Fe <sub>0.85</sub> Sn <sub>0.05</sub> Y <sub>0.1</sub> O <sub>2.9-<math>\delta</math></sub> F <sub>0.1-<math>\delta</math></sub> -Ce <sub>0.8</sub> Sm <sub>0.2</sub> O <sub>2-<math>\delta</math></sub> | BaZr <sub>0.1</sub> Ce <sub>0.7</sub> Y <sub>0.2</sub> O <sub>3-<math>\delta</math></sub>                   | 641                                  | [27]             |
| Sr <sub>3</sub> Fe <sub>2</sub> O <sub>7-<math>\delta</math></sub> -BaZr <sub>0.3</sub> Ce <sub>0.5</sub> Y <sub>0.2</sub> O <sub>3-<math>\delta</math></sub>                                                                                  | BaZr <sub>0.3</sub> Ce <sub>0.5</sub> Y <sub>0.2</sub> O <sub>3-<math>\delta</math></sub>                   | 380                                  | [16]             |
| BaCe <sub>0.2</sub> Fe <sub>0.6</sub> Pr <sub>0.2</sub> O <sub>3-<math>\delta</math></sub>                                                                                                                                                     | BaZr <sub>0.1</sub> Ce <sub>0.7</sub> Y <sub>0.2</sub> O <sub>3-<math>\delta</math></sub>                   | 316                                  | [28]             |
| Pr <sub>2</sub> BaNiMnO <sub>3-<math>\delta</math></sub>                                                                                                                                                                                       | BaZr <sub>0.1</sub> Ce <sub>0.7</sub> Y <sub>0.1</sub> Yb <sub>0.1</sub> O <sub>3-<math>\delta</math></sub> | 570                                  | [29]             |
| Ba <sub>0.5</sub> Sr <sub>0.5</sub> Zn <sub>0.2</sub> Fe <sub>0.8</sub> O <sub>3-<math>\delta</math></sub>                                                                                                                                     | BaZr <sub>0.1</sub> Ce <sub>0.7</sub> Y <sub>0.2</sub> O <sub>3-<math>\delta</math></sub>                   | 277                                  | [30]             |
| <b>BCYF2</b>                                                                                                                                                                                                                                   | <b>BaZr<sub>0.1</sub>Ce<sub>0.7</sub>Y<sub>0.1</sub>Yb<sub>0.1</sub>O<sub>3-<math>\delta</math></sub></b>   | <b>656</b>                           | <b>This work</b> |

## References

- [1] L. Zhao, B. He, X. Zhang, R. Peng, G. Meng and X. Liu, *J. Power Sources*, 2010, **195**, 1859-1861.

- [2] F. Dong, D. Chen, Y. Chen, Q. Zhao and Z. Shao, *J. Mater. Chem.*, 2012, **22**, 15071-15079.
- [3] F. Dong, Y. Chen, R. Ran, D. Chen, M.O. Tadé, S. Liu and Z. Shao, *J. Mater. Chem. A*, 2013, **1**, 9781-9791.
- [4] G. Yang, J. Shen, Y. Chen, O. Tadé and Z. Shao, *J. Power Sources*, 2015, **298**, 184-192.
- [5] M. Zhu, Z. Cai, T. Xia, Q. Li, L. Huo and H. Zhao, *Int. J. Hydrogen Energy*, 2016, **41**, 4784-4791.
- [6] F. Dong, M. Ni, W. He, Y. Chen, G. Yang, D. Chen and Z. Shao, *J. Power Sources*, 2016, **326**, 459-465.
- [7] L. Gao, M. Zhu, T. Xia, Q. Li, T. Li and H. Zhao, *Electrochim. Acta*, 2018, **289**, 428-436.
- [8] J. Wang, Y. Lam, M. Saccoccio, Y. Gao, D. Chen and F. Ciucci, *J. Power Sources*, 2016, **324**, 224-232.
- [9] Y. Song, Y. Chen, M. Xu, W. Wang, Y. Zhang, G. Yang, R. Ran, W. Zhou and Z. Shao, *Adv. Mater.*, 2020, **32**, 1906979.
- [10] Z. Wang, P. Lv, L. Yang, R. Guan, J. Jiang, F. Jin and T. He, *Ceram. Int.*, 2020, **46**, 18216-18223.
- [11] R. Tarutina, G. Lyagaeva, S. Farlenkov, I. Vylkov, K. Vdovin, A. Murashkina, K. Demin and A. Medvedev, *J. Solid State Electrochem.*, 2020, **24**, 1453-1462.
- [12] Y. Chen, S. Yoo, K. Pei, D. Chen, L. Zhang and B. deGlee, *Adv. Funct. Mater.*, 2017, **28**, 1704907.
- [13] C. Zhang and H. Zhao, *J. Mater. Chem.*, 2012, **22**, 18387-18394.
- [14] D. Kim, J. Son, M. Kim, J. Park and H. Joo, *J. Eur. Ceram. Soc.*, 2021, **41**, 5939-5946.
- [15] N. Danilov, J. Lyagaeva, G. Vdovin, E. Pikalova and D. Medvedev, *Energy Convers. Manage.*, 2018, **172**, 129-137.
- [16] Z. Wang, W. Yang, P. Shafi, L. Bi, Z. Wang, R. Peng, C. Xia, W. Liu and Y. Lu, *J. Mater. Chem. A*, 2015, **3**, 8405-8412.
- [17] Y. Song, J. Liu, Y. Wang, D. Guan, A. Seong, M. Liang, M. J. Robson, X. Xiong, Z. Zhang, G. Kim, Z. Shao and F. Ciucci, *Adv. Energy Mater.* 2021, **11**, 2101899.
- [18] Z. Tao, L. Bi, Z. Zhu and W. Liu, *J. Power Sources*, 2009, **194**, 801-804.
- [19] D. Shan, Z. Gong, Y. Wu, L. Miao, K. Dong and W. Liu, *Ceram. Int.*, 2017, **43**, 3660-3663.
- [20] Z. Wei, J. Wang, X. Yu, Z. Li, Y. Zhao and J. Chai, *Int. J. Hydrogen Energy*, 2021, **46**, 23868-23878.
- [21] R. Tarutina, K. Vdovin, G. Lyagaeva and A. Medvedev, *J. Alloys Compd.*, 2020, 831, 154895.
- [22] Y. Wu, K. Li, Y. Yang, W. Song, Z. Ma, H. Chen, X. Ou, L. Zhao, M. Khan and Y. Ling, J.

Alloys Compd., 2020, 814, 152220.

- [23] X. Xu, H. Wang, J. Ma, W. Liu, X. Wang, M. Fronzi and L. Bi, *J. Mater. Chem. A*, 2019, **7**, 18792-18798.
- [24] Y. Xia, Z. Jin, H. Wang, Z. Gong, H. Lv, R. Peng, W. Liu and L. Bi, *J. Mater. Chem. A*, 2019, **7**, 16136-16148.
- [25] J. Cui, J. Wang, X. Zhang, G. Li, K. Wu, Y. Cheng and J. Zhou, *Int. J. Hydrogen Energy*, 2019, **44**, 21127-21135.
- [26] J. Cui, J. Wang, X. Zhang, G. Li, K. Wu, Y. Cheng and J. Zhou, *J. Power Sources*, 2019, **413**, 148-157.
- [27] J. Liu, Z. Jin, L. Miao, J. Ding, H. Tang, Z. Gong, R. Peng and W. Liu, *Int. J. Hydrogen Energy*, 2019, **44**, 11079-11087.
- [28] X. Zhou, N. Hou, T. Gan, L. Fan, Y. Zhang, J. Li, G. Gao, Y. Zhao and Y. Li, *J. Power Sources*, 2021, **495**, 229776.
- [29] Q. Wang, J. Hou, Y. Fan, X. Xi, J. Li, Y. Lu, G. Huo, L. Shao, Z. Fu and L. Luo, *J. Mater. Chem. A*, 2020, **8**, 7704-7712.
- [30] H. Ding, B. Lin, X. Liu and G. Meng, *Electrochem. Commun.*, 2008, **10**, 1388-1391.
